# Supplementary material for: Holey etching strategy of siloxene nanosheets to improve the rate performance of photo-assisted Li–O2 batteries
Source: Royal Society of Chemistry journal article supplement (doi:10.1039/d4nr03850a), 2024-11-22
Supplement: d4nr03850a1.pdf [file d4nr03850a1.pdf]

## **Holey etching strategy of siloxene nanosheets to improve the rate performance of photo-assisted Li-O<sub>2</sub> batteries**

Wenpu Xu <sup>abc</sup>, Zitai Fu <sup>abc</sup>, Huanbao Shi <sup>abc</sup>, Qi Li\* <sup>bc</sup>, Xuexia He <sup>bc</sup>, Jie Sun <sup>bc</sup>,  
Ruibing Jiang <sup>bc</sup>, Zhibin Lei <sup>abc</sup>, Zong-Huai Liu\* <sup>abc</sup>

<sup>a</sup>Key Laboratory of Applied Surface and Colloid Chemistry (Shaanxi Normal University), Ministry of Education, Xi'an, 710062, P. R. China

<sup>b</sup>Shaanxi Key Laboratory for Advanced Energy Devices, Xi'an, 710119, P. R. China

<sup>c</sup>School of Materials Science and Engineering, Shaanxi Normal University, Xi'an, 710119, P. R. China

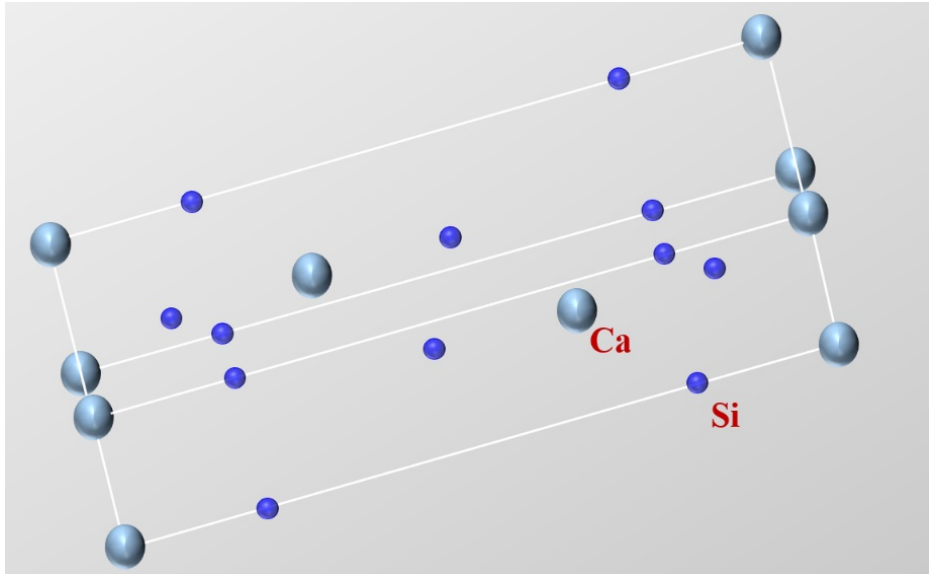

**Figure S1.** Crystal structure of CaSi<sub>2</sub> precursor.

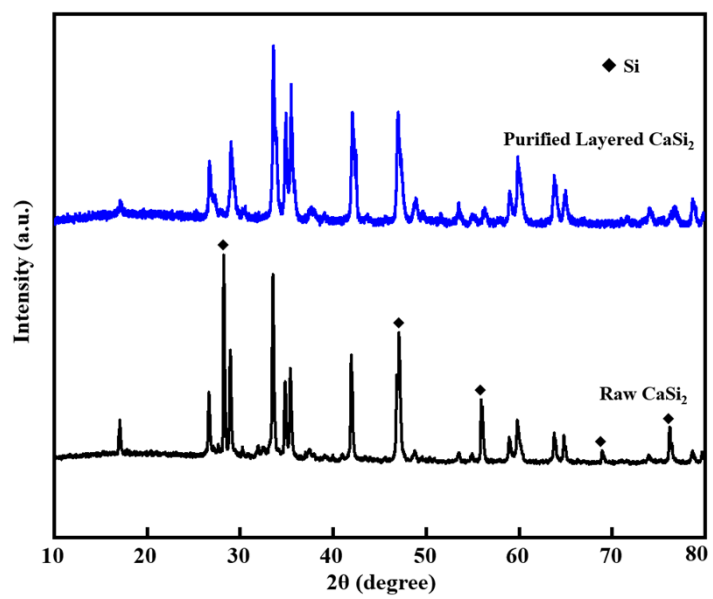

**Figure S2.** XRD patterns of raw  $\text{CaSi}_2$  and purified layered  $\text{CaSi}_2$ .

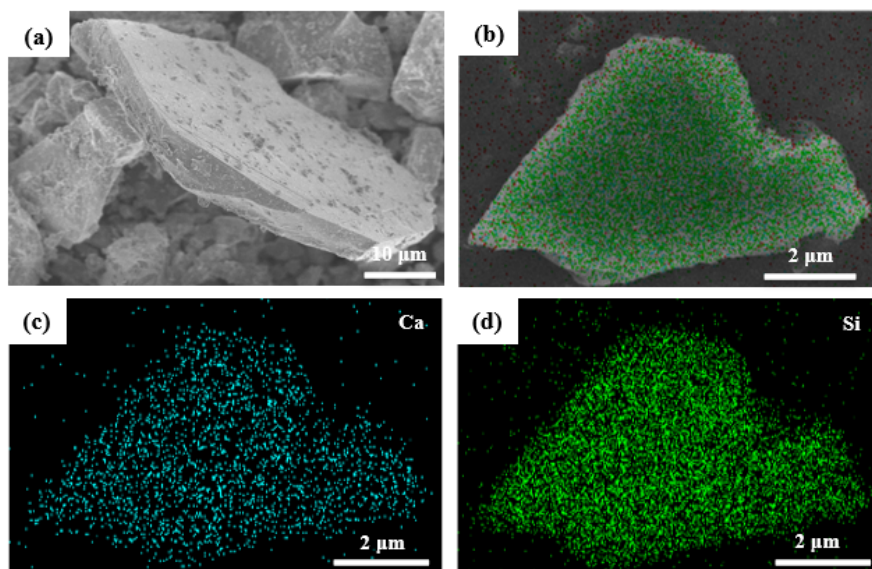

**Figure S3.** Morphology characteristic of purified layered  $\text{CaSi}_2$ : SEM image (a) and EDS-mapping images (b-d).

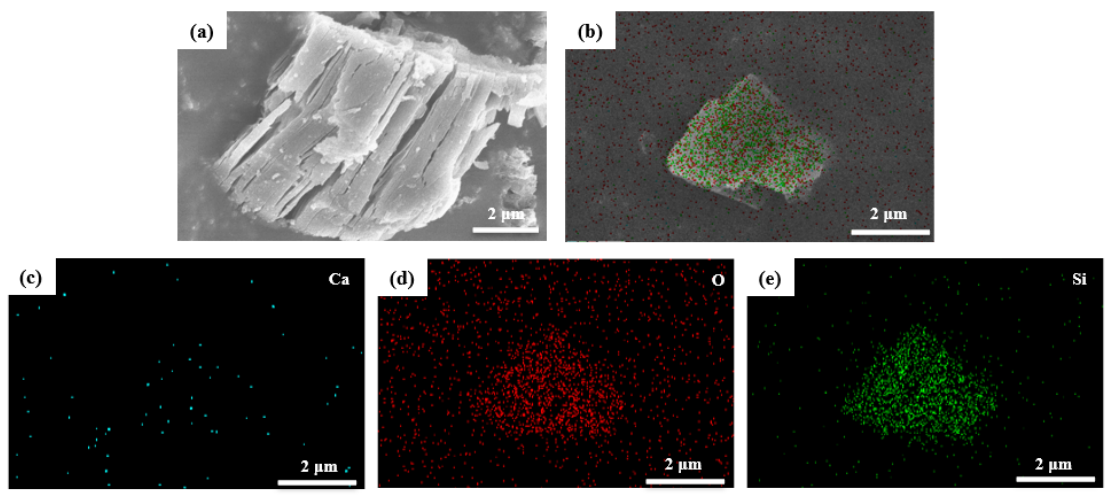

**Figure S4.** Morphology characterization of siloxene: SEM image (a) and the corresponding EDS-mapping images (b-e).

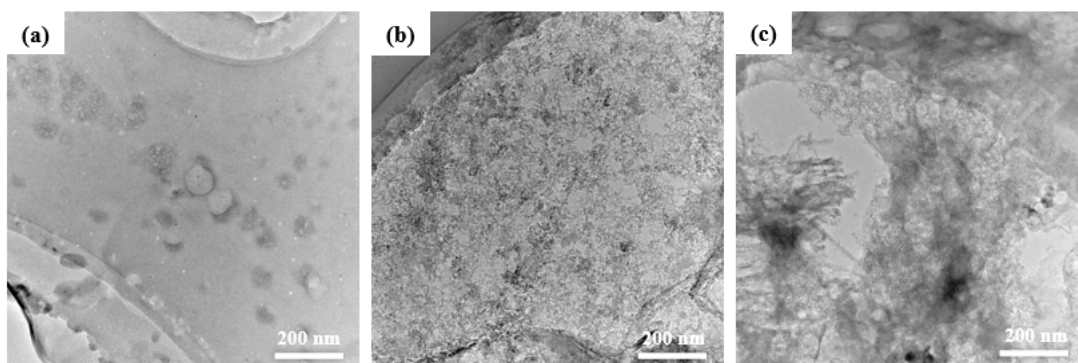

**Figure S5.** TEM images of the obtained products by treating siloxene NSs adsorbed Ag<sup>+</sup> ions with different concentrations at same HF+H<sub>2</sub>O<sub>2</sub> solution: 0.005 mol L<sup>-1</sup> (a), 0.02 mol L<sup>-1</sup> (b), and 0.03 mol L<sup>-1</sup> (c).

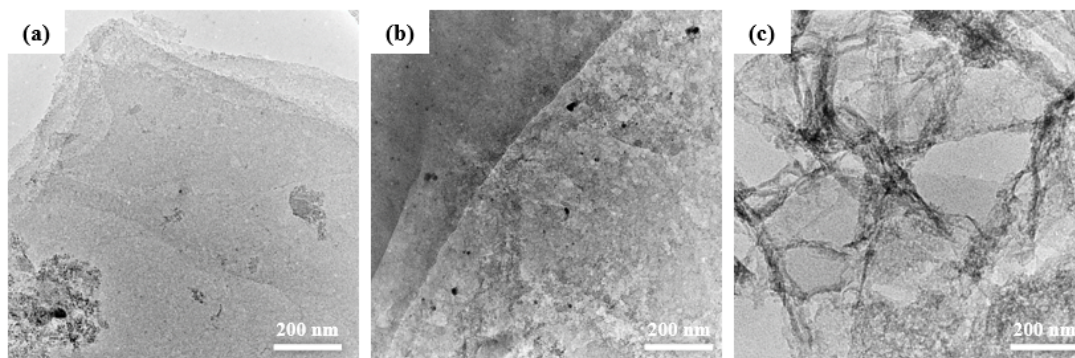

**Figure S6.** TEM images of the obtained products by treating siloxene NSs adsorbed  $0.545 \text{ mol L}^{-1} \text{ Ag}^+$  ions with different HF concentrations:  $0.452 \text{ mol L}^{-1}$  (a),  $0.753 \text{ mol L}^{-1}$  (b), and  $1.13 \text{ mol L}^{-1}$  (c).

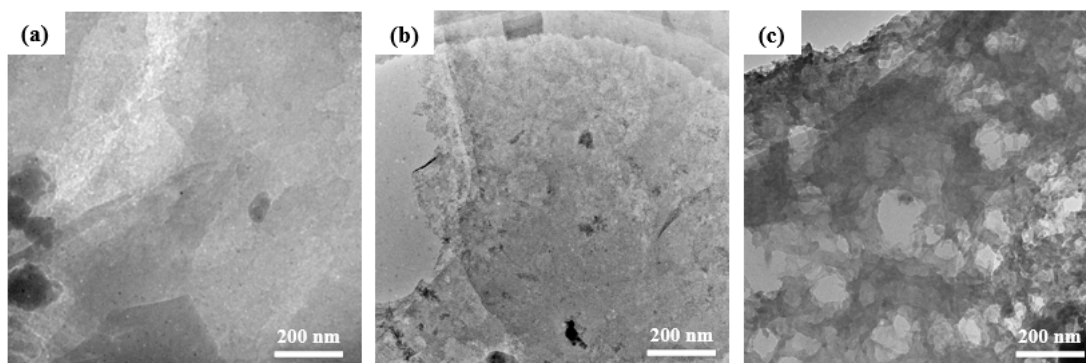

**Figure S7.** TEM images of the obtained products by treating siloxene NSs adsorbed  $0.327 \text{ mol L}^{-1} \text{ Ag}^+$  ions with different  $\text{H}_2\text{O}_2$  concentrations:  $0.196 \text{ mol L}^{-1}$  (a),  $0.245 \text{ mol L}^{-1}$  (b), and  $0.49 \text{ mol L}^{-1}$  (c).



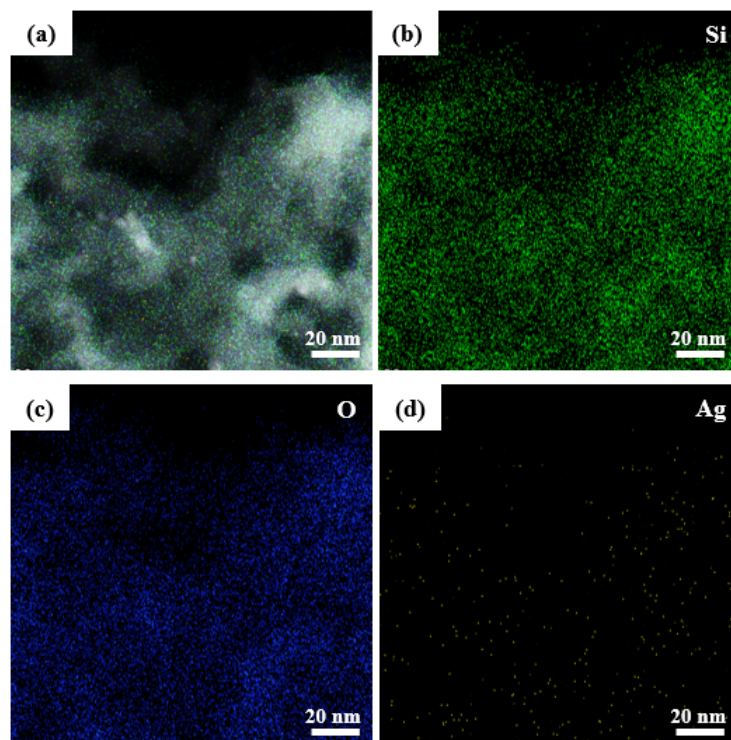

**Figure S8.** Energy spectrum images of P-siloxene NSs by spherical aberration electron microscope.

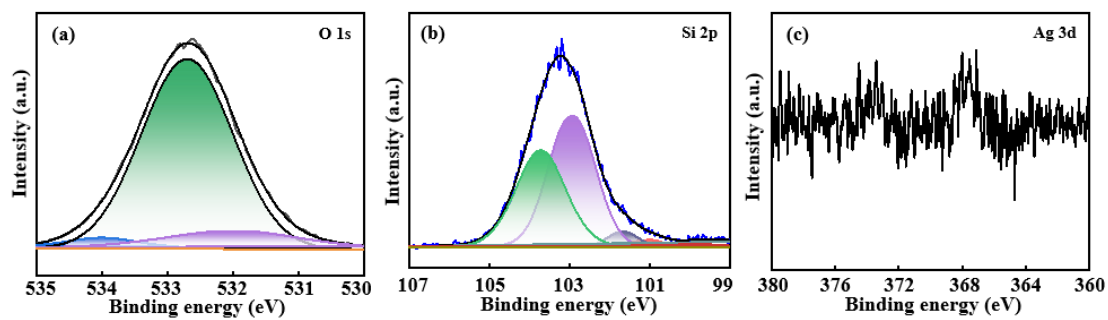

**Figure S9.** XPS spectra of P-siloxene NSs: O 1s spectrum (a), Si 2p spectrum (b), and Ag 3d spectrum (c).

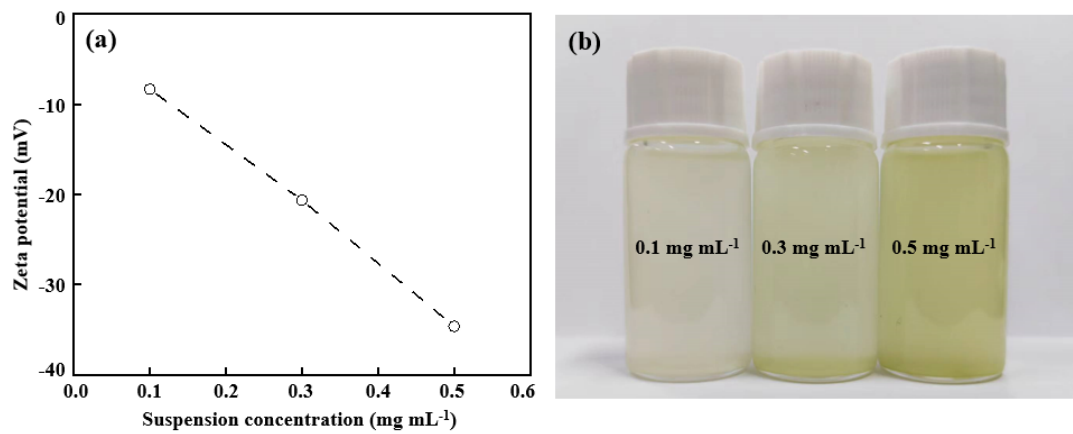

**Figure S10.** Zeta potential (a) and the optical images (b) of P-siloxene NSs suspensions with different concentrations.

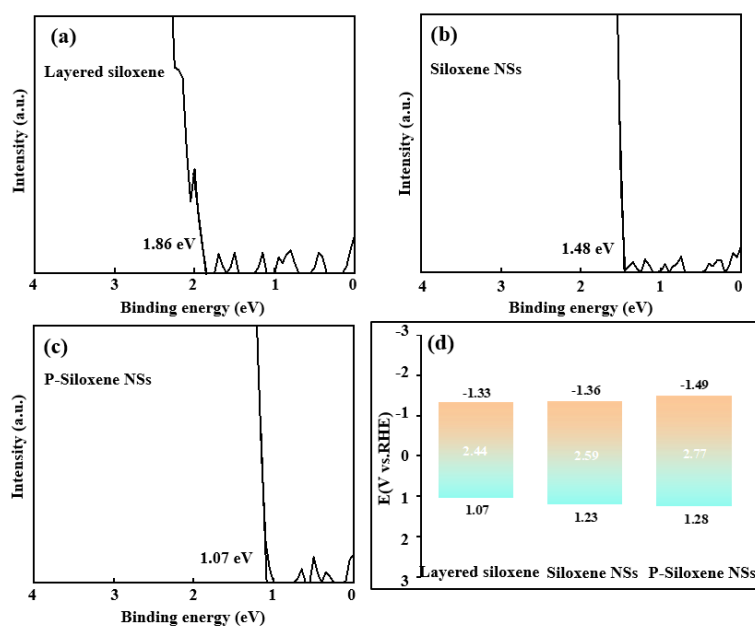

**Figure S11.** UPS and fitting curves of three siloxene photo-catalytic with different structures: layered siloxene (a), siloxene nanosheets (b), and P-siloxene NSs (c). Energy structure diagram of layered siloxene, siloxene NSs, and P-siloxene NSs.

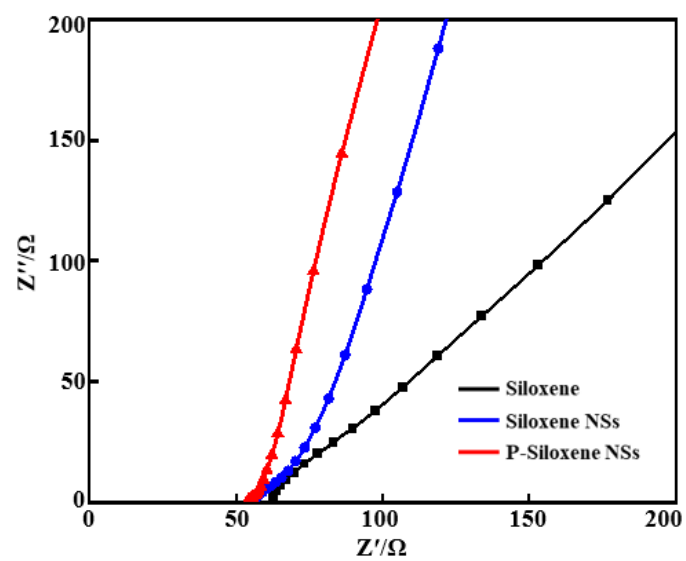

**Figure S12.** EIS spectra of layered siloxene, siloxene NSs, and P-siloxene NSs in three electrodes.

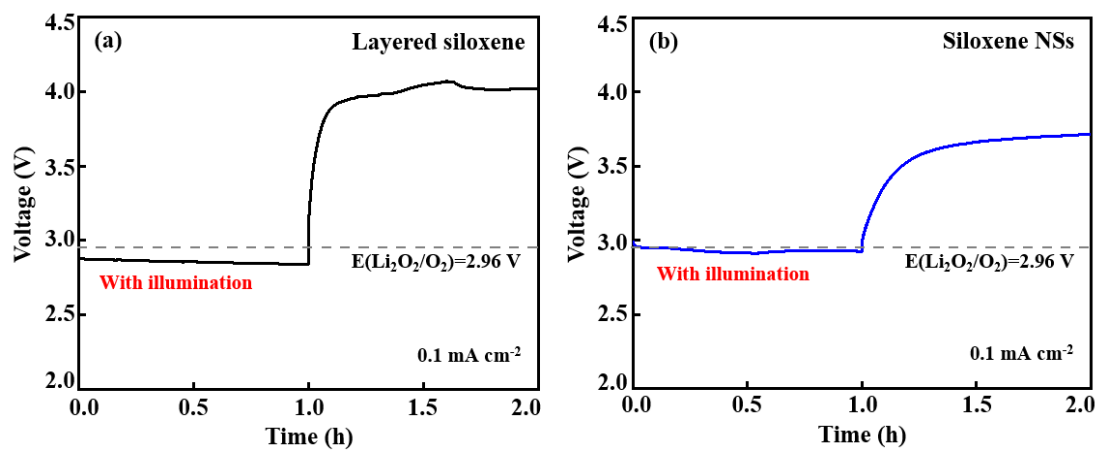

**Figure S13.** Charge and discharge potentials of photo-assisted Li-O<sub>2</sub> batteries assembled with layered siloxene (a) and siloxene NSs (b) with illumination.

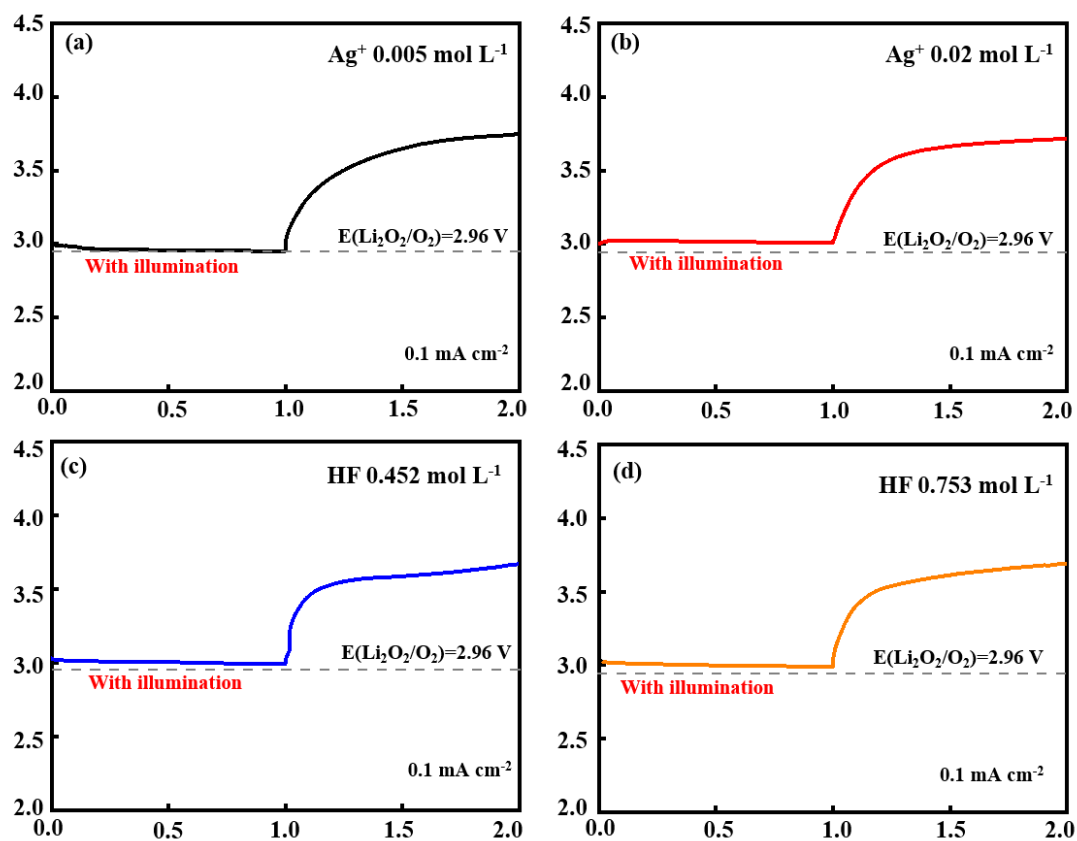

**Figure S14.** Charge and discharge potentials of photo-assisted Li-O<sub>2</sub> batteries assembled with Ag<sup>+</sup> concentrations of 0.005 mol L<sup>-1</sup> (a), 0.02 mol L<sup>-1</sup> (b) and HF concentrations of 0.452 mol L<sup>-1</sup> (c), 0.753 mol L<sup>-1</sup> (d) of P-siloxene NSs with illumination.

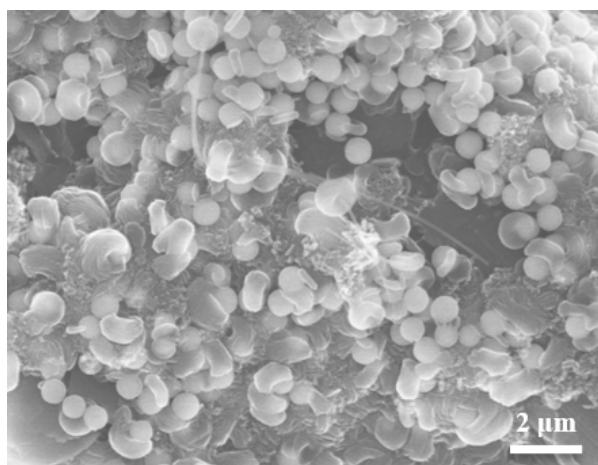

**Figure S15.** SEM image of  $\text{Li}_2\text{O}_2$  intermediate product after complete discharge.



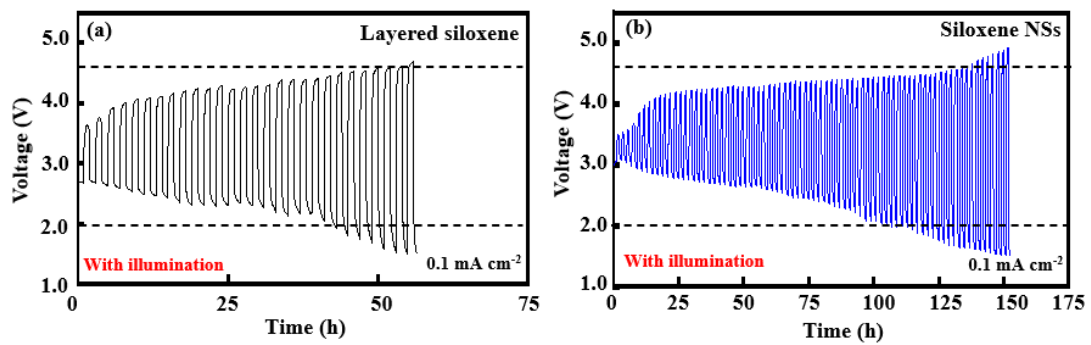

**Figure S16.** Cycle stability of photo-assisted Li-O<sub>2</sub> batteries assembled with layered siloxene (a) and siloxene NSs (b).

**Table S1.** Comparison of photo-electrochemistry performance for P-siloxene NSs photoelectrode with other reported photoelectrodes

| Types of Photocatalysts                                       | Current Density (mA cm <sup>-2</sup> ) | Discharge voltage (V) | Charge voltage (V) | Round-trip efficiency (%) | Rate performance current density (mA cm <sup>-2</sup> ) | Ref.       |
|---------------------------------------------------------------|----------------------------------------|-----------------------|--------------------|---------------------------|---------------------------------------------------------|------------|
| C <sub>3</sub> N <sub>4</sub>                                 | 0.04                                   | 3.22                  | 3.38               | 95.3                      | 3.10/3.50<br>0.15                                       | 1          |
| g-C <sub>3</sub> N <sub>4</sub>                               | 0.01                                   | 2.70                  | 1.90               | 142                       | 2.70/2.25<br>0.03                                       | 2          |
| TiO <sub>2</sub> /Fe <sub>2</sub> O <sub>3</sub>              | 0.01                                   | 3.01                  | 3.20               | 94                        | 2.80/3.75<br>0.05                                       | 3          |
| Fe <sub>2</sub> O <sub>3</sub> /C <sub>3</sub> N <sub>4</sub> | 0.1                                    | 3.13                  | 3.19               | 98.2                      | 2.75/3.50<br>0.4                                        | 4          |
| Au/Nv-C <sub>3</sub> N <sub>4</sub>                           | 0.05                                   | 3.16                  | 3.26               | 97                        | 3.00/3.27<br>0.25                                       | 5          |
| Co-TABQ                                                       | 0.1                                    | 3.12                  | 3.32               | 94                        | 3.60/2.80<br>0.5                                        | 6          |
| Siloxene QDs                                                  | 0.075                                  | 3.72                  | 1.60               | 230                       | 3.50/2.16<br>3.0                                        | 7          |
| P-Siloxene NSs                                                | 0.1                                    | 3.05                  | 3.40               | 90                        | 2.87/3.82<br>0.8                                        | This study |

### Supplementary References

1. Z. Zhu, X. Shi, G. Fan, F. Li, J. Chen, *Angew. Chem. Int. Ed.* 2019, **131**, 19197-19202.
2. Y. Liu, N. Li, K. Liao, Q. Li, M. Ishida, H. Zhou, *J. Mater. Chem. A* 2016, **4**, 12411-12415.
3. M. Li, X. Wang, F. Li, L. Zheng, J. Xu, J. Yu, *Adv. Mater.* 2020, **32**, 1907098.
4. Z. Zhu, Q. Lv, Y. Ni, S. Gao, J. Geng, J. Liang, F. Li, *Angew. Chem. Int. Ed.* 2022, **134**, 202116699.
5. Z. Zhu, Y. Ni, Q. Lv, J. Geng, W. Xie, F. Li, J. Chen, *PNAS* 2021, **118**, 2024619118.
6. Q. Lv, Z. Zhu, S. Zhao, L. Wang, Q. Zhao, F. Li, L. A. Archer, J. Chen, *J. Am. Chem. Soc.* 2021, **143**, 1941-1947.
7. C. Jia, F. Zhang, N. Zhang, Q. Li, X. He, J. Sun, R. Jiang, Z. Lei, Z.-H. Liu, *ACS Nano* 2023, **17**, 1713-1722.
